# Supplementary material
Source: PubMed Central journal article supplement (PMC3691721)
Supplement: cb400070a_si_001.pdf [file cb400070a_si_001.pdf]

## Supporting Information

### **Organometallic cyclopentadienyl iridium(III) anticancer complexes with new mechanisms of action: NCI-60 screening, mitochondrial targeting and apoptosis in human cancer cells**

Jessica M. Hearn<sup>1</sup>, Isolda Romero-Canelón<sup>2</sup>, Bushra Qamar<sup>2</sup>, Zhe Liu<sup>2</sup>, Ian Hands-Portman<sup>3</sup> and Peter J. Sadler\*

<sup>1</sup>Warwick Systems Biology Centre, <sup>2</sup>Department of Chemistry, <sup>3</sup>School of Life Sciences, University of Warwick, Gibbet Hill Road, Coventry CV4 7AL, United Kingdom

\*To whom correspondence may be addressed

## MATERIALS

For complex synthesis,  $\text{IrCl}_3 \cdot n\text{H}_2\text{O}$  was purchased from Precious Metals Online (PMO pty Ltd). All solvents were obtained from commercial sources such as Fisher Scientific and Sigma-Aldrich and were used without further purification; ethanol was obtained from the same suppliers but dried over  $\text{Mg}/\text{I}_2$  before use. 1,10-Phenanthroline monohydrate, 2,2'-bipyridine, 2-phenylpyridine, 4-(2-pyridylazo)-N,N-dimethylaniline ligands were purchased from Sigma. Deuterated solvents were purchased from Cambridge Isotopes Limited. ICP-MS standards (Ir) were obtained from Inorganic Ventures.

For the biological experiments, RPMI-1640, medium, as well as foetal bovine serum, L-glutamine, penicillin/streptomycin mixture, trypsin, trypsin/EDTA, phosphate buffered saline (PBS) were purchased from PAA Laboratories GmbH. CDDP ( $\geq 99.9\%$ ), trichloroacetic acid ( $\geq 99\%$ ), sulforhodamine B (75%), sodium phosphate monobasic monohydrate ( $\geq 99\%$ ), sodium phosphate dibasic heptahydrate ( $\geq 99\%$ ), acetic acid ( $\geq 99\%$ ), L-BSO ( $>97\%$ ), staurosporine, PI ( $>94\%$ ) and RNase A were obtained from Sigma Aldrich together with the Annexin V-FITC Apoptosis Detection Kit and Abcam JC-10 Mitochondrial Membrane Potential Assay kit for flow cytometry.

For TEM, glutaraldehyde (2%), cacodylate buffer at pH 7.6, 2% uranyl acetate in maleate buffer, 100% propylene oxide and Embed 812 resin were all purchased from Agar Scientific.

NMR data ( $^1\text{H}$ ,  $^{13}\text{C}$ ) were acquired using 5 mm NMR tubes in the NMR Spectroscopy Facility of Warwick University on either a 500-MHz spectrometer Bruker DRX-500 or a 400-MHz Bruker spectrometer, experiments were carried out at 298 K unless otherwise stated.  $^1\text{H}$ -NMR

chemical shifts were internally referenced. Typically, the spectral width was 20 ppm. Spectra were processed using Bruker Topspin 2.1. Elemental analysis (percentages of C, H and N) was carried out on a CE-440 Exeter Elemental Analyzer by the Warwick Analytical Service.

## METHODS

**Compound synthesis and characterization.**  $[(\eta^5\text{-C}_5\text{Me}_4\text{C}_6\text{H}_5)\text{Ir}(\text{azpy-NMe}_2)\text{Cl}]\text{PF}_6$  (**4**).  $[(\eta^5\text{-C}_5\text{Me}_4\text{C}_6\text{H}_5)\text{IrCl}_2]_2$  (45 mg, 0.05 mmol), and ligand 4-(2-pyridylazo)-N,N-dimethylaniline (23 mg, 0.10 mmol) in MeOH (20 mL) were stirred for 12 h at ambient temperature. The volume was slowly reduced to half on a rotary evaporator and  $\text{NH}_4\text{PF}_6$  (45 mg, 0.28 mmol) was added. After standing at 277 K, a microcrystalline product formed. This was collected by filtration, washed with diethyl ether, and recrystallised from methanol/diethyl ether. Yield: 56 mg (70%).  $^1\text{H NMR}$  (400 MHz,  $\text{CDCl}_3$ ):  $\delta$  = 8.34 (d, 1H,  $J$  = 8.0 Hz), 8.25 (d, 1H,  $J$  = 5.5 Hz), 8.11–8.07 (m, 2H), 8.03 (t, 1H,  $J$  = 8.0 Hz), 7.49–7.41 (m, 5H), 7.13 (t, 1H,  $J$  = 7.0 Hz), 6.68–6.64 (m, 2H), 3.31 (s, 6H), 1.75 (s, 3H), 1.69 (s, 3H), 1.65 (s, 3H), 1.49 (s, 3H). Anal. Calcd for  $\text{C}_{28}\text{H}_{31}\text{ClF}_6\text{IrN}_4\text{P}$  (796.15): C, 42.24; H, 3.92; N, 7.04. Found: C, 42.32; H, 3.91; N, 7.16.

**IC<sub>50</sub> determinations.** A2780 cells were seeded in 96 well plates with ca. 5000 cells per well. The plates were incubated at 310 K for 48 h. A 2 mM stock solution of each compound was prepared in 5% DMSO, 95% saline, from which final dilutions ranging from 0.1 to 100  $\mu\text{M}$  were made with RPMI-1640. Drug exposure time was 24 h at 310 K, after which supernatants were removed cells were allowed to recover for 72 h in drug-free medium at 310 K.

Sulforhodamine B assay was used to determine cell survival. IC<sub>50</sub> values (as the half maximal inhibitory concentration) were determined from duplicates of triplicates in independent experiments and standard deviations were calculated.

**IC<sub>50</sub> modulation by co-incubation with L-BSO.** Cell viability studies were carried out as described in the above section with the following experimental modification. Cells were co-exposed to L-BSO and each of the Ir complexes, using solutions which was prepared independently and added within 5 min of each other.

**TEM sample preparation.** A2780 cells were seeded at a density of 5 x 10<sup>6</sup> cells/100mm Petri dish using 10 mL RPMI-1640 medium. On day 1 the cells were exposed to 5 μM of compound 1. After 24 h the medium was removed and the cells were washed with PBS, fixed with 2% glutaraldehyde (Agar Scientific) in cacodylate buffer at pH 7.6 (Agar Scientific) and left for 1 h agitating on a shaker. Plates were rinsed with cacodylate buffer and the cells were transferred to falcon tubes, and centrifuged. Finally, cells were dehydrated with graded levels of ethanol (20-100% ethanol). Samples were then infiltrated with 100% propylene oxide for 1 h followed by 1:1 mixture of propylene oxide and embed 812 resin for 6 h. This was then replaced with several changes of 100% resin over an 18 h period before curing for 24 h at 333 K. Blocks were trimmed and sectioned on a Leica Ultracut E ultramicrotome (Leica Microsystems). Sections of 70-80 nm thick were collected on 400-mesh Cu grids and stained with 2% uranyl acetate. Sections were imaged on a JOEL 1200EXII TEM with a Gatan 1 k × 1 k CCD camera.

**Mitochondrial polarization assay.** These experiments were carried out using the JC-10 Mitochondrial Membrane Potential Assay kit from Abcam, according to the manufacturer's instructions. Briefly, Cells were seeded at  $1 \times 10^6$  cells per well in 6-well plates and left to incubate for 24 h. Drug solutions were added at the  $IC_{50}$  and  $1/3$  of the  $IC_{50}$  (Table 1) and the cells left to incubate for a further 4 or 24 h. Cells were washed twice with PBS and transferred to 12 x 75 mm flow cytometry test tubes in 500  $\mu$ L solution of dye (125  $\mu$ L JC-10 in 25 mL binding buffer) and the tubes protected from light for an incubation period of 30 min at ambient temperature. CCCP was used as positive control, with a drug exposure time of 30 min. Samples were immediately run on Beckton Dickinson FACScan with fluorescence detection, where FL2 fluorescence decreases as membrane polarization occurs.

**Table S1A.** NCI/NIH database correlations for complex 1

| Correlations to Standard Agents and Synthetics database | Pairwise correlation coefficient ( <i>r</i> ) |
|---------------------------------------------------------|-----------------------------------------------|
| 64414                                                   | 0.839                                         |
| 634791                                                  | 0.835                                         |
| 754708                                                  | 0.881                                         |
| 754721                                                  | 0.902                                         |
| 754722                                                  | 0.849                                         |
| 755637                                                  | 0.755                                         |
| 755639                                                  | 0.881                                         |
| 755640                                                  | 0.828                                         |
| 761277                                                  | 0.916                                         |
| Actinomycin D                                           | 0.698                                         |
| Asiaticoside                                            | 0.79                                          |
| Aurantomycin B                                          | 0.819                                         |
| Bisantrene HCl                                          | 0.739                                         |
| Bouvardin                                               | 0.806                                         |
| Bouvardin ternafolia                                    | 0.712                                         |
| Bruceantin                                              | 0.557                                         |
| C.I Basic Red 2                                         | 0.773                                         |
| Calendulaglycoside D2                                   | 0.766                                         |
| Chromomycin A3                                          | 0.829                                         |
| Daunorubicin                                            | 0.514                                         |
| Deoxybouvardin                                          | 0.856                                         |
| Ellipticine deriv                                       | 0.714                                         |
| Gamitrinib-TPP                                          | 0.908                                         |
| Harringtonine                                           | 0.707                                         |
| Macbecin II                                             | 0.602                                         |
| Malform A                                               | 0.761                                         |
| Mito-tempol                                             | 0.765                                         |
| Mitramycin                                              | 0.614                                         |
| Nogalomycin C                                           | 0.71                                          |
| Olivomycin                                              | 0.821                                         |
| Phermerol                                               | 0.762                                         |
| Phyllanthoside                                          | 0.929                                         |
| Quassinoid                                              | 0.783                                         |
| Rhodium dimer                                           | 0.802                                         |
| Romidepson                                              | 0.713                                         |
| Sempervirine, nitrate, dihydrate                        | 0.729                                         |
| Stendomycin salicylate                                  | 0.769                                         |
| Taxol                                                   | 0.756                                         |
| Undulatone                                              | 0.76                                          |
| Vinblastine sulfate                                     | 0.804                                         |
| Vinorelbine tartrate                                    | 0.83                                          |

**Table S1B.** NCI/NIH database correlations for complex 2

| Correlations to Standard Agents and Synthetics database | Pairwise correlation coefficient ( <i>r</i> ) |
|---------------------------------------------------------|-----------------------------------------------|
| 634791                                                  | 0.86                                          |
| 644614                                                  | 0.821                                         |
| 754708                                                  | 0.874                                         |
| 754722                                                  | 0.865                                         |
| 755637                                                  | 0.745                                         |
| 755639                                                  | 0.858                                         |
| 755640                                                  | 0.775                                         |
| 756057                                                  | 0.927                                         |
| 761277                                                  | 0.832                                         |
| Actinomycin D                                           | 0.58                                          |
| Anthrapyrazole                                          | 0.501                                         |
| Asiaticoside                                            | 0.757                                         |
| Aurantimycin B                                          | 0.76                                          |
| Bisanrene HCl                                           | 0.727                                         |
| Bouvardin                                               | 0.791                                         |
| Chromomycin A3                                          | 0.768                                         |
| Cl.Basic red 2                                          | 0.739                                         |
| Daunorubicin                                            | 0.514                                         |
| Deoxybouvardin                                          | 0.805                                         |
| Doxorubicin                                             | 0.501                                         |
| Echinomycin                                             | 0.517                                         |
| Ellipticine deriv                                       | 0.722                                         |
| Macbecin II                                             | 0.696                                         |
| Malformin A                                             | 0.772                                         |
| Mito-tempol                                             | 0.766                                         |
| Mitramycin                                              | 0.535                                         |
| Phemerol                                                | 0.738                                         |
| Phyllanthoside                                          | 0.769                                         |
| Quassinoid                                              | 0.71                                          |
| Rhodium dimer                                           | 0.743                                         |
| Sempervirine, nitrate, dihydrate                        | 0.703                                         |
| Stendomycin salicylate                                  | 0.75                                          |
| Taxol                                                   | 0.693                                         |
| Vinblastine sulfate                                     | 0.767                                         |
| Vinorelbine tartrate                                    | 0.692                                         |

**Table S1C.** NCI/NIH database correlations for complex 3

| Correlations to Standard Agents and Synthetics database | Pairwise correlation coefficient ( <i>r</i> ) |
|---------------------------------------------------------|-----------------------------------------------|
| 634791                                                  | 0.627                                         |
| 644614                                                  | 0.686                                         |
| 754708                                                  | 0.627                                         |
| 754722                                                  | 0.6                                           |
| 755639                                                  | 0.606                                         |
| 755640                                                  | 0.647                                         |
| 756057                                                  | 0.643                                         |
| 761277                                                  | 0.604                                         |
| 761278                                                  | 0.67                                          |
| 5,6-ethylenediquino[3,2-B]                              | 0.676                                         |
| A-7                                                     | 0.552                                         |
| Berberine iodide                                        | 0.554                                         |
| C.I basic red 2                                         | 0.661                                         |
| Diethylcyanine                                          | 0.591                                         |
| Juncusol deriv                                          | 0.6                                           |
| Laurodin                                                | 0.575                                         |
| Leucinostatin A                                         | 0.582                                         |
| Mito-tempol                                             | 0.574                                         |
| Phemerol                                                | 0.653                                         |
| Rhodium dimer                                           | 0.573                                         |
| Stendomycin salicylate                                  | 0.606                                         |
| Trichloromethyldihydroberberine, 8-                     | 0.583                                         |
| Vancide 26                                              | 0.619                                         |
| Vinblastine sulfate                                     | 0.507                                         |



**Table S1D.** NCI/NIH database correlations for complex 4

| Correlations to Standard Agents and Synthetics database | Pairwise correlation coefficient ( <i>r</i> ) |
|---------------------------------------------------------|-----------------------------------------------|
| 754709                                                  | 0.738                                         |
| 755638                                                  | 0.711                                         |
| 2-Hydroxy discorhabdin D                                | 0.759                                         |
| 9-Alpha-hydroxyparthenolide                             | 0.705                                         |
| Aquaymycin                                              | 0.688                                         |
| Bis(helenaliny)glutarate                                | 0.741                                         |
| Bishelenaliny malonate                                  | 0.678                                         |
| Carquinostatin B                                        | 0.693                                         |
| Cycloalkannin                                           | 0.698                                         |
| Diccorhabdin B                                          | 0.708                                         |
| Discorhabdin C, TFA                                     | 0.778                                         |
| Discorhabdin G                                          | 0.71                                          |
| Discorhabdin I                                          | 0.707                                         |
| Enhydrin A                                              | 0.698                                         |
| Eupacurvin                                              | 0.739                                         |
| Farinosin, dehydro                                      | 0.68                                          |
| Geldamycin                                              | 0.72                                          |
| Herbimycin                                              | 0.729                                         |
| Julimycin B2                                            | 0.714                                         |
| L-cysteine analogue                                     | 0.544                                         |
| Landomycin A                                            | 0.694                                         |
| Melampodin                                              | 0.704                                         |
| Nanomycin                                               | 0.677                                         |
| Pibenzimol HCl                                          | 0.585                                         |
| Rifamycin                                               | 0.759                                         |
| Rifamycin SV                                            | 0.677                                         |
| Rifamycin SV                                            | 0.759                                         |
| Streptonigrin                                           | 0.701                                         |
| Tolypomycin Y                                           | 0.677                                         |
| Tris(4-methyltropolonato)bismuth(III)                   | 0.689                                         |
| Weisiensin A                                            | 0.703                                         |
| Withacnistin                                            | 0.7                                           |
| Withanolide, 4-B-hydroxy                                | 0.677                                         |

**Table S1E.** NCI/NIH database correlations for cisplatin

| Correlations to Standard Agents and Synthetics database | Pairwise correlation coefficient ( <i>r</i> ) |
|---------------------------------------------------------|-----------------------------------------------|
| 2,2'-bioxirane                                          | 0.724                                         |
| 8,9- dimethoxycamptothecin                              | 0.649                                         |
| Amsacrine                                               | 0.619                                         |
| Aphidicolin glycinate                                   | 0.637                                         |
| Aziridinyl benzoquinone                                 | 0.651                                         |
| AZQ                                                     | 0.718                                         |
| Bizelesin                                               | 0.659                                         |
| Bleomycin A5, sulfate                                   | 0.625                                         |
| Camptothecin, acetate                                   | 0.602                                         |
| Carboplatin                                             | 0.783                                         |
| Chlorambucil                                            | 0.717                                         |
| Chlorambucil                                            | 0.671                                         |
| Chlorozotocin                                           | 0.616                                         |
| Dianhydrogalatitol                                      | 0.713                                         |
| Didemnin B                                              | 0.515                                         |
| Dijodbenzotef                                           | 0.677                                         |
| Epoxy piperazine                                        | 0.667                                         |
| Flavoneacetic acid                                      | 0.688                                         |
| Hepsulfam                                               | 0.652                                         |
| Imidazoquinoline                                        | 0.691                                         |
| Isophosphoramidate mustard                              | 0.623                                         |
| K31                                                     | 0.682                                         |
| K33                                                     | 0.68                                          |
| Kedarcidin                                              | 0.624                                         |
| Malonotodiammine platinum (II)                          | 0.815                                         |
| Melphalan                                               | 0.673                                         |
| Mitomycin C                                             | 0.652                                         |
| Piperazine alkylator                                    | 0.671                                         |
| Pipobroman                                              | 0.63                                          |
| Porfiromycin                                            | 0.64                                          |
| Thio-tepa                                               | 0.708                                         |
| Tomaymycin                                              | 0.601                                         |
| Triethlenemelamine                                      | 0.667                                         |
| Uracil nitrogen mustard                                 | 0.706                                         |

**Table S1F.** NCI/NIH database correlations for oxaliplatin

| Correlations to Standard Agents and Synthetics database | Pairwise correlation coefficient ( <i>r</i> ) |
|---------------------------------------------------------|-----------------------------------------------|
| 1,2-Diamino-cyclohexane-Pt-SEO3                         | 0.747                                         |
| 1,6- Dimethoxyphenanzine DI-N-oxide                     | 0.577                                         |
| 3-Deazauridine                                          | 0.548                                         |
| 4-Chloro-3-nitrobenzanilide                             | 0.601                                         |
| 5-Fluorouracil                                          | 0.534                                         |
| Acivicin                                                | 0.508                                         |
| Anguidine                                               | 0.538                                         |
| Bispyridocarbazollum DMS                                | 0.553                                         |
| Brequinar                                               | 0.506                                         |
| Carboplatin                                             | 0.715                                         |
| Cyclopentenylcytosine                                   | 0.565                                         |
| Dichloroallyl lawsone                                   | 0.529                                         |
| Largomycin                                              | 0.555                                         |
| Methotrexate                                            | 0.557                                         |
| Miliisane B                                             | 0.584                                         |
| Miliusate                                               | 0.608                                         |
| N,N- dibenzyl-daunomycin                                | 0.668                                         |
| N,N- dibenzyl-daunomycin                                | 0.668                                         |
| Niveusin A                                              | 0.579                                         |
| Tetraplatin                                             | 0.644                                         |
| Tetraplatin                                             | 0.644                                         |
| Uridine, 5-fluoro                                       | 0.605                                         |

**Table S2.** Summary of NCI/NIH correlations for compounds 1–4, cisplatin (cis) and oxaliplatin (ox).

| Class                    | Agent                 | 1  | 2 | 3 | 4 | cis | ox |
|--------------------------|-----------------------|----|---|---|---|-----|----|
| DNA inter                | actinomycin D*        |    |   |   |   |     |    |
|                          | bisantrene HCl        | +  | + |   |   |     |    |
|                          | chromomycin A3        |    | + |   |   |     |    |
|                          | daunorubicin*         |    |   |   |   |     |    |
|                          | echinomycin           |    |   |   |   |     |    |
|                          | mitramycin            |    |   |   |   |     |    |
|                          | rifamycin SV          |    |   |   | + |     |    |
|                          | olivomycin            | ++ |   |   |   |     |    |
| DNA antimet <sup>§</sup> | rhodium dimer         | ++ | + |   |   |     |    |
|                          | macbecin II           |    |   |   |   |     |    |
| Alkyl                    | landomycin A          |    |   |   |   |     |    |
|                          | L-cysteine analogue   |    |   |   |   |     |    |
| Topo                     | doxorubicin*          |    |   |   |   |     |    |
|                          | anthrapyrazole        |    |   |   |   |     |    |
|                          | berberine iodide      |    |   |   |   |     |    |
| Prot syn <sup>§</sup>    | phyllanthoside        | +  | + |   |   |     |    |
|                          | bruceantin            |    |   |   |   |     |    |
|                          | didemnin B            |    |   |   |   |     |    |
|                          | anguidine             |    |   |   |   |     |    |
|                          | aurantimycin B        | ++ |   |   |   |     |    |
|                          | ellipticine deriv     | +  | + |   |   |     |    |
|                          | bouvardin             | ++ | + |   |   |     |    |
|                          | harringtonine*        | +  |   |   |   |     |    |
|                          | undulatone            | +  |   |   |   |     |    |
| Mitosis                  | taxol*                | +  |   |   |   |     |    |
|                          | vinblastine sulfate*  | ++ | + |   |   |     |    |
|                          | malformin A           | +  | + |   |   |     |    |
|                          | vinorelbine tartrate* | ++ |   |   |   |     |    |
| Oxidat <sup>§</sup>      | asiaticoside          | +  | + |   |   |     |    |
|                          | cycloalkannin         |    |   |   |   |     |    |
|                          | nogalomycin C         | +  |   |   |   |     |    |

(\*) Indicates a compound in clinical trials for the treatment of cancer.

(+) indicates a compound with a correlation where  $r > 0.7$  and (++) where  $r > 0.8$ .

(§) DNA inter: DNA intercalators; DNA antimet: DNA antimetabolite; Alkyl: alkylating agents; Topo: topoisomerase inhibitors; Prot syn: protein synthesis inhibitors; Mitosis: mitosis inhibitors; Oxidat: inhibitors of oxidative processes.

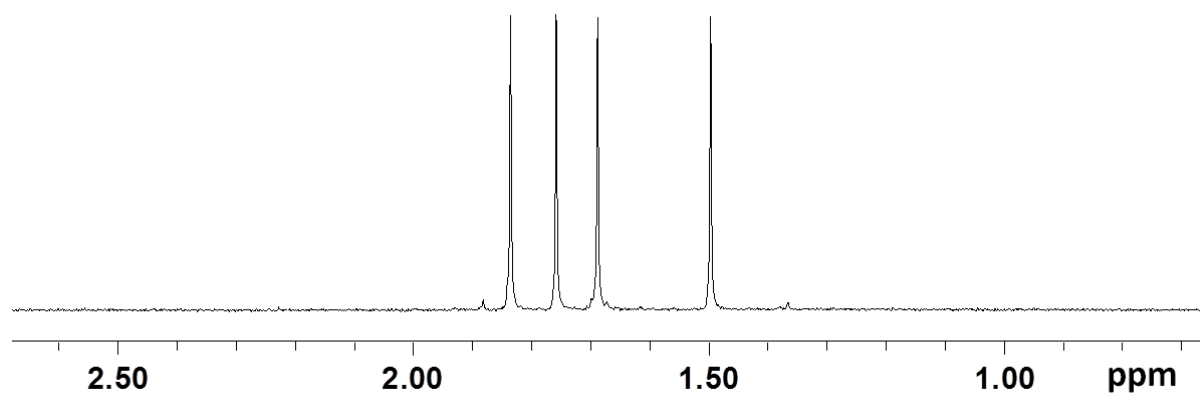

**Figure S1.**  $^1\text{H}$  NMR spectrum showing the methyl region of **4** (0.7 mM) in 10% MeOD- $d_4$ /90% D<sub>2</sub>O (v/v). By comparison with the spectrum of the aqua complex (prepared using AgNO<sub>3</sub> to remove the chloride ligand), it can be concluded that the above spectrum is that of intact complex **4** and that no hydrolysis was observed after 24 h. Also the addition of NaCl did not cause further changes to the spectrum.

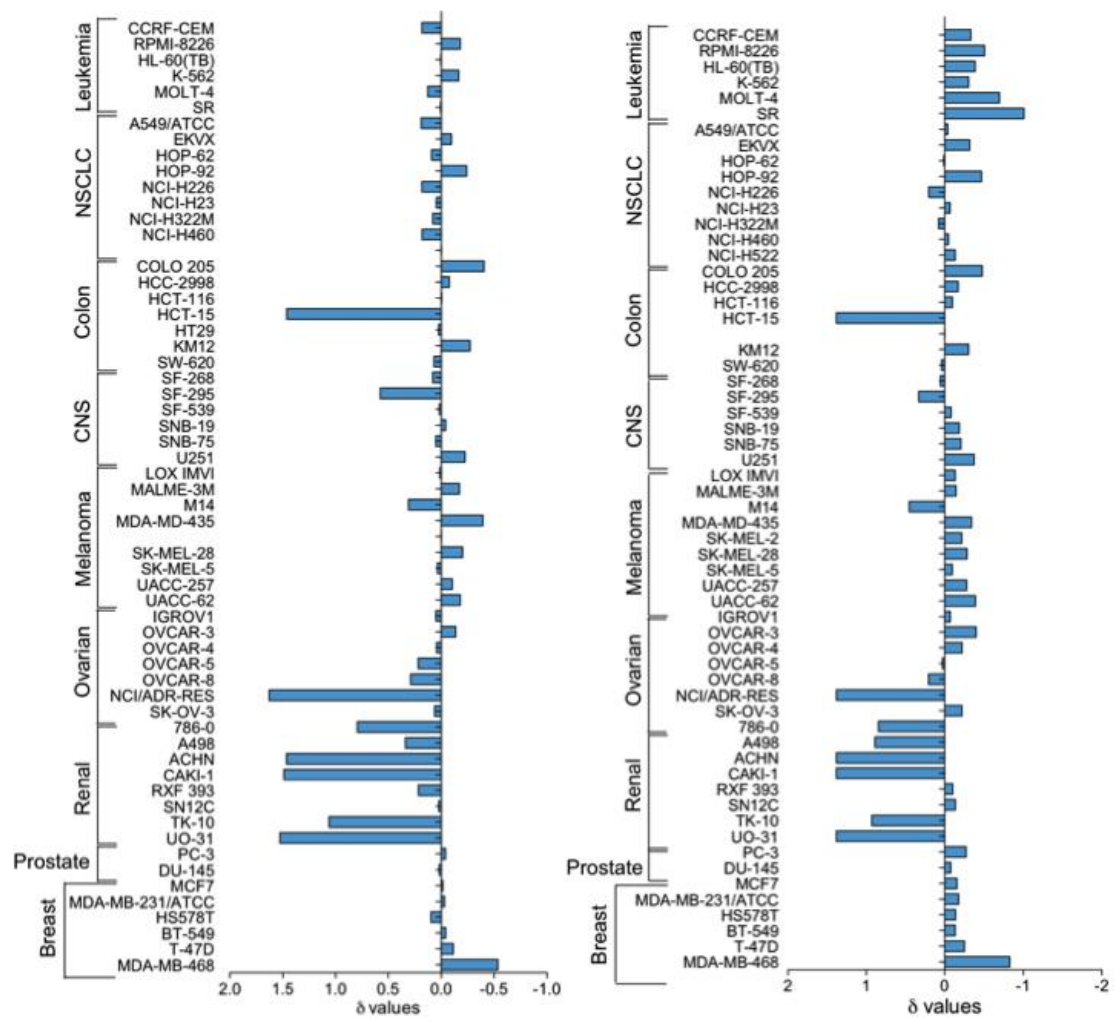

Figure S2. NCI60  $GI_{50}$  mean graphs for 1 (left) and 2 (right).

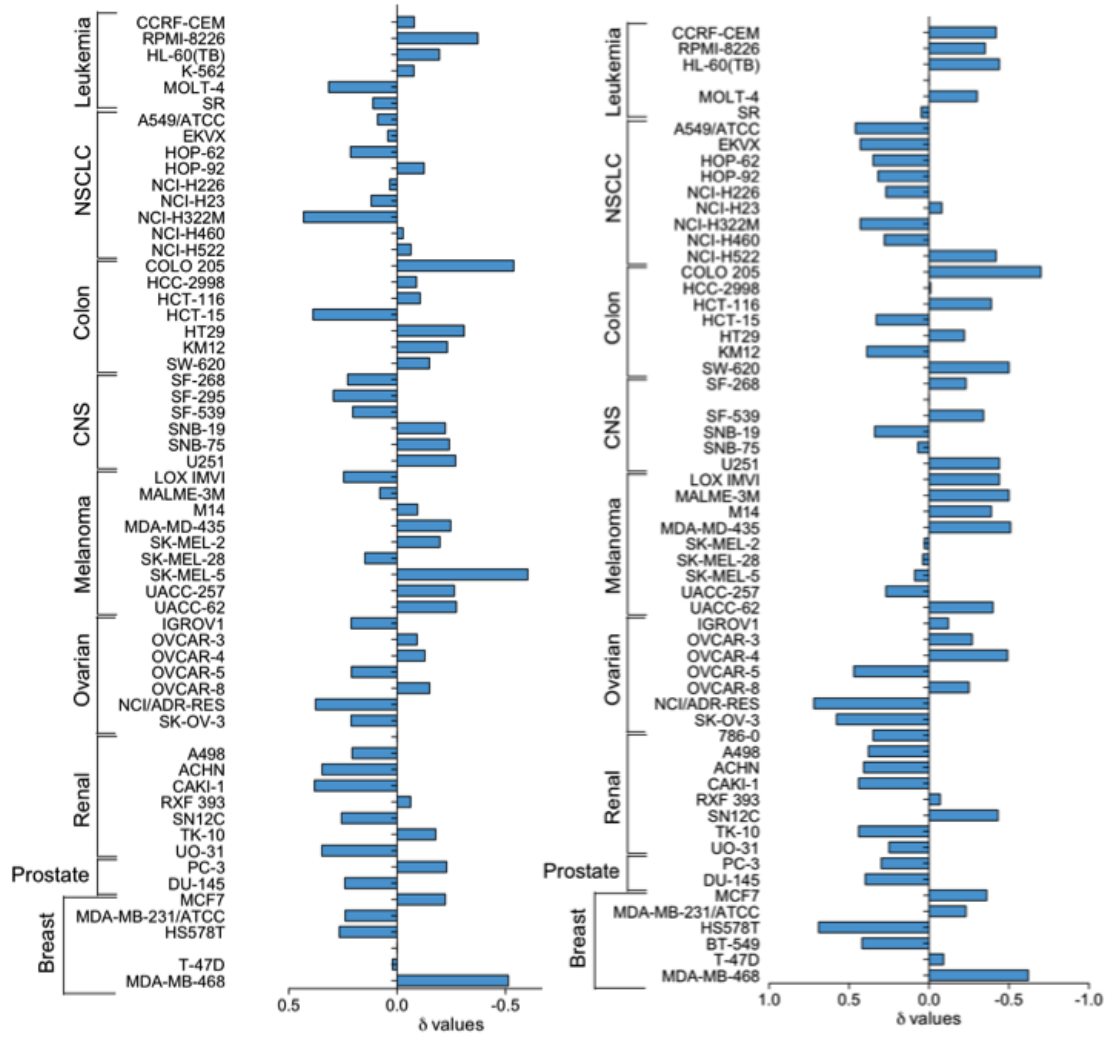

Figure S3. NCI60 GI<sub>50</sub> mean graphs for 3 (left) and 4 (right).
